# Supplementary material
Source: Springer Nature journal article supplement (https://www.springermedizin.de/resource/supplementary/12955_2003_17_MOESM3_ESM.pdf/9558378)

# KOOS QOL

Diff. between the two assessments

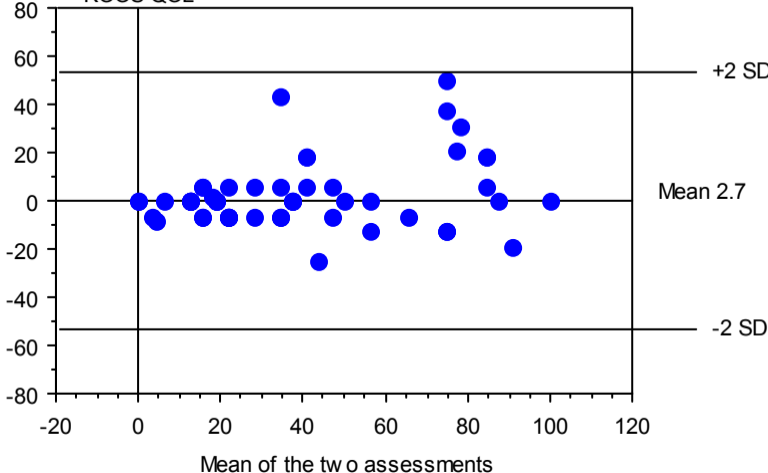

Supplement: MOESM3 [file 9558378]
